# Supplementary material for: Bi0.33Zr2(PO4)3, a negative thermal expansion material with a Nasicon-type structure
Source: Royal Society of Chemistry journal article supplement (doi:10.1039/d2dt02914f), 2022-01-01
Supplement: d2dt02914f1.pdf [file d2dt02914f1.pdf]

## Supplementary Information

### **Bi<sub>0.33</sub>Zr<sub>2</sub>(PO<sub>4</sub>)<sub>3</sub>, a negative thermal expansion material with Nasicon-type structure**

Daneshwaran Balaji and Sathasivam Pratheep Kumar\*

Department of Chemistry, School of Advanced Sciences, VIT-AP University, Amaravati  
522237, Andhra Pradesh, India.

\*E-mail: [pratheep.kumar@vitap.ac.in](mailto:pratheep.kumar@vitap.ac.in), [pratheepvit@gmail.com](mailto:pratheepvit@gmail.com)

Tel: +91 863 2370444, Ext. 5835

### Content

|                                                                                                                                       |   |
|---------------------------------------------------------------------------------------------------------------------------------------|---|
| Figure S1. TG-DTA traces of Bi <sub>0.33</sub> Zr <sub>2</sub> (PO <sub>4</sub> ) <sub>3</sub> .....                                  | 2 |
| Figure S2. Raman spectrum of Bi <sub>0.33</sub> Zr <sub>2</sub> (PO <sub>4</sub> ) <sub>3</sub> .....                                 | 2 |
| Figure S3. FTIR spectrum of Bi <sub>0.33</sub> Zr <sub>2</sub> (PO <sub>4</sub> ) <sub>3</sub> .....                                  | 3 |
| Table S1 IR and Raman peak assignments for Bi <sub>0.33</sub> Zr <sub>2</sub> (PO <sub>4</sub> ) <sub>3</sub> .....                   | 4 |
| Table S2 Variation of 2θ values with temperature for Bi <sub>0.33</sub> Zr <sub>2</sub> (PO <sub>4</sub> ) <sub>3</sub> .....         | 5 |
| Table S3 Bond length changes of Bi <sub>0.33</sub> Zr <sub>2</sub> (PO <sub>4</sub> ) <sub>3</sub> as a function of temperature ..... | 6 |

Figure S1. TG-DTA traces of  $\text{Bi}_{0.33}\text{Zr}_2(\text{PO}_4)_3$

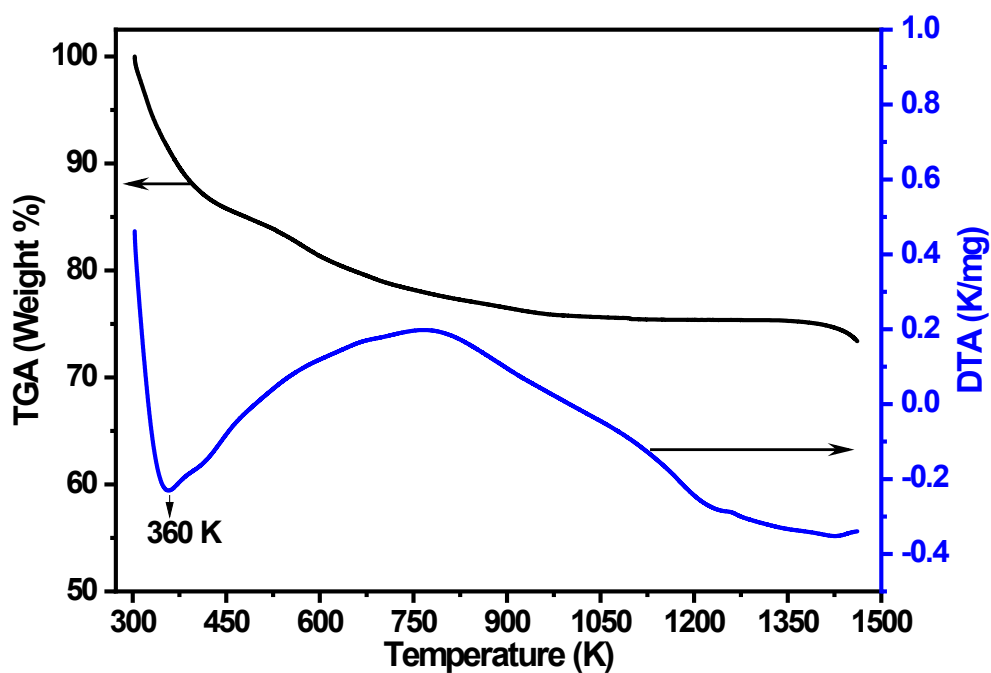

Figure S2. Raman spectrum of  $\text{Bi}_{0.33}\text{Zr}_2(\text{PO}_4)_3$

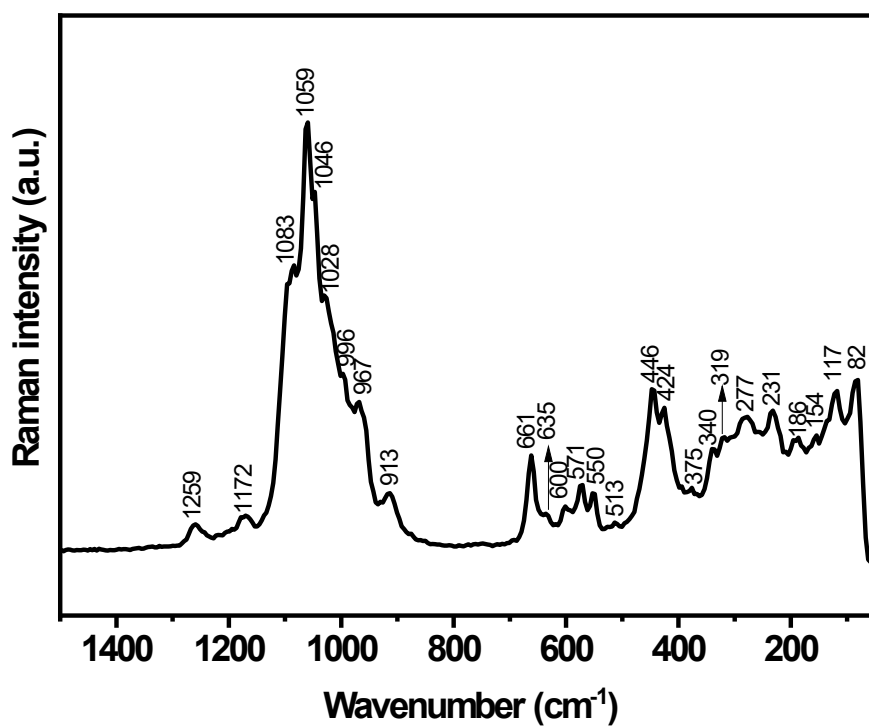

Figure S3. FTIR spectrum of  $\text{Bi}_{0.33}\text{Zr}_2(\text{PO}_4)_3$

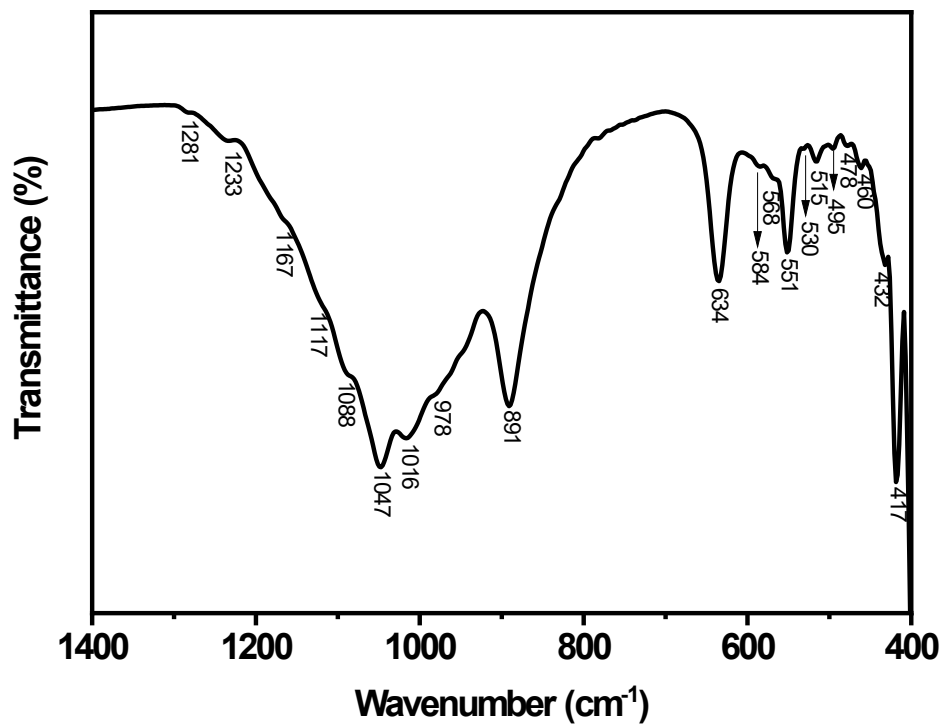

**Table S1. IR and Raman peak assignments for  $\text{Bi}_{0.33}\text{Zr}_2(\text{PO}_4)_3$**

| Assignments        |                              | $\text{Bi}_{0.33}\text{Zr}_2(\text{PO}_4)_3$                          |                                                                               |
|--------------------|------------------------------|-----------------------------------------------------------------------|-------------------------------------------------------------------------------|
|                    |                              | <i>Raman (<math>\text{cm}^{-1}</math>)</i>                            | <i>IR (<math>\text{cm}^{-1}</math>)</i>                                       |
| $\text{PO}_4^{3-}$ | $\nu_3 (\nu_{\text{as}})$    | 1259 w<br>1172 w<br>1083 sh<br>1059 s<br>1046 sh<br>1028 sh<br>996 sh | 1281 w<br>1233 sh<br>1167 sh<br>1117 sh<br>1088 sh<br>1047 s<br>1016 s        |
|                    | $\nu_1 (\nu_{\text{s}})$     | 967 sh<br>913 sh                                                      | 978 sh<br>891 s                                                               |
|                    | $\nu_4 (\delta_{\text{as}})$ | 661 s<br>635 sh<br>600 sh<br>571 w<br>550 w<br>513 w                  | 634 s<br>584 w<br>568 w<br>551 s<br>530 w<br>515 w<br>495 w<br>478 w<br>460 w |
|                    | $\nu_2 (\delta_{\text{s}})$  | 446 s<br>424 sh                                                       | 432 sh<br>417 s                                                               |

**Table S2. Variation of 2 $\theta$  values with temperature for Bi<sub>0.33</sub>Zr<sub>2</sub>(PO<sub>4</sub>)<sub>3</sub>**

| <b>Bonds</b>   | <b>300 K</b> | <b>373 K</b> | <b>473 K</b> | <b>573 K</b> | <b>673 K</b> | <b>773 K</b> | <b>873 K</b> | <b>973 K</b> | <b>1073 K</b> |
|----------------|--------------|--------------|--------------|--------------|--------------|--------------|--------------|--------------|---------------|
| Bi1 – O4 (x 6) | 2.69081      | 2.5078       | 2.76305      | 2.665        | 2.66526      | 2.65082      | 2.67025      | 2.72429      | 2.66731       |
| Zr1 – O4 (x 3) | 1.81198      | 1.98455      | 1.872        | 1.77092      | 1.75789      | 1.91055      | 1.67803      | 1.75927      | 1.68313       |
| Zr1 – O1 (x 3) | 2.17175      | 2.08658      | 2.0091       | 2.18483      | 2.17625      | 1.97782      | 2.26419      | 2.09673      | 2.25705       |
| Zr2 – O2 (x 3) | 1.91605      | 1.82217      | 2.17229      | 1.88861      | 1.92775      | 1.98095      | 1.90554      | 1.99542      | 1.90359       |
| Zr2 – O5 (x 3) | 2.17728      | 2.12716      | 2.21586      | 2.18285      | 2.17528      | 2.19862      | 2.16467      | 2.52786      | 2.16412       |
| Zr3 – O3 (x 3) | 1.99923      | 1.89977      | 2.02456      | 2.00672      | 2.00433      | 2.16096      | 1.9252       | 2.03031      | 1.94819       |
| Zr3 – O6 (x 3) | 2.23741      | 2.12815      | 2.47519      | 2.20204      | 2.22038      | 2.25663      | 2.30242      | 2.2509       | 2.26941       |
| P1 – O1 (x 2)  | 1.25235      | 1.69908      | 1.24984      | 1.44421      | 1.36882      | 1.51822      | 1.22664      | 1.56828      | 1.19846       |
| P1 – O6 (x 2)  | 1.61108      | 1.79372      | 1.94618      | 1.40939      | 1.49936      | 1.55843      | 1.62759      | 1.63853      | 1.66938       |
| <b>hkl</b>     | <b>300 K</b> | <b>373 K</b> | <b>473 K</b> | <b>573 K</b> | <b>673 K</b> | <b>773 K</b> | <b>873 K</b> | <b>973 K</b> | <b>1073 K</b> |
| 100            | 11.56685     | 11.59017     | 11.59857     | 11.60212     | 11.61985     | 11.64155     | 11.66355     | 11.68156     | 11.68895      |
| 102            | 13.85593     | 13.87117     | 13.92889     | 13.93804     | 13.94584     | 13.94587     | 13.96779     | 13.97774     | 13.98204      |
| 104            | 19.19368     | 19.21353     | 19.36578     | 19.36832     | 19.36273     | 19.35346     | 19.35999     | 19.36519     | 19.38288      |
| 2-10           | 20.13308     | 20.15468     | 20.15378     | 20.16860     | 20.20055     | 20.22812     | 20.24430     | 20.25419     | 20.26214      |
| 200            | 23.21336     | 23.23569     | 23.30529     | 23.31552     | 23.33073     | 23.34551     | 23.35472     | 23.36928     | 23.37985      |
| 204            | 27.96888     | 27.99481     | 28.09261     | 28.10476     | 28.11668     | 28.12921     | 28.13827     | 28.15166     | 28.16604      |
| 2-16           | 30.74819     | 30.77808     | 30.99144     | 30.98734     | 30.96695     | 30.94661     | 30.95407     | 30.96996     | 30.98917      |
| 108            | 33.01731     | 33.02613     | 33.34395     | 33.33346     | 33.29925     | 33.26034     | 33.26267     | 33.28469     | 33.30517      |

|         |         |         |         |         |         |         |         |         |         |
|---------|---------|---------|---------|---------|---------|---------|---------|---------|---------|
| P2 – O5 | 1.49945 | 1.37992 | 1.56287 | 1.48145 | 1.59195 | 1.48799 | 1.49335 | 1.20073 | 1.38577 |
| P2 – O2 | 1.77243 | 1.89171 | 1.66293 | 1.72077 | 1.65782 | 1.53172 | 1.75953 | 1.39358 | 1.74938 |
| P2 – O3 | 1.53715 | 1.86328 | 1.56287 | 1.57067 | 1.61724 | 1.67509 | 1.52643 | 1.41258 | 1.54259 |
| P2 – O4 | 1.78777 | 1.59189 | 1.56675 | 1.82897 | 1.68219 | 1.70204 | 1.78048 | 2.12166 | 1.74938 |

**Table S3. Bond length changes of  $\text{Bi}_{0.33}\text{Zr}_2(\text{PO}_4)_3$  as a function of temperature**
